# Supplementary material for: Syntheses, crystal structures and luminescence properties of lanthanide-based coordination polymers constructed from a functionalized terpyridyl carboxylate ligand
Source: Royal Society of Chemistry journal article supplement (doi:10.1039/c6ce00681g), 2016-01-01

## Supporting Information

**Table S1. Summary of Crystal Data and Structural Refinement Parameters**

| compound                                                                    | 1                                                                                | 2                                                                                | 3                                                                                | 4                                                                                | 6                                                                                |
|-----------------------------------------------------------------------------|----------------------------------------------------------------------------------|----------------------------------------------------------------------------------|----------------------------------------------------------------------------------|----------------------------------------------------------------------------------|----------------------------------------------------------------------------------|
| empirical formula                                                           | C <sub>132</sub> H <sub>94</sub> N <sub>18</sub> Nd <sub>2</sub> O <sub>17</sub> | C <sub>132</sub> H <sub>94</sub> N <sub>18</sub> Sm <sub>2</sub> O <sub>17</sub> | C <sub>132</sub> H <sub>94</sub> N <sub>18</sub> Eu <sub>2</sub> O <sub>17</sub> | C <sub>132</sub> H <sub>94</sub> N <sub>18</sub> Gd <sub>2</sub> O <sub>17</sub> | C <sub>132</sub> H <sub>94</sub> N <sub>18</sub> Dy <sub>2</sub> O <sub>17</sub> |
| formula weight                                                              | 2492.75                                                                          | 2504.99                                                                          | 2508.20                                                                          | 2518.77                                                                          | 2529.27                                                                          |
| crystal system                                                              | Triclinic                                                                        | Triclinic                                                                        | Triclinic                                                                        | Triclinic                                                                        | Triclinic                                                                        |
| space group                                                                 | P-1                                                                              | P-1                                                                              | P-1                                                                              | P-1                                                                              | P-1                                                                              |
| <i>a</i> (Å)                                                                | 13.6238(10)                                                                      | 13.6332(18)                                                                      | 13.659(3)                                                                        | 13.616(3)                                                                        | 13.6739(8)                                                                       |
| <i>b</i> (Å)                                                                | 14.4019(10)                                                                      | 14.3983(19)                                                                      | 14.392(3)                                                                        | 14.396(3)                                                                        | 14.3581(8)                                                                       |
| <i>c</i> (Å)                                                                | 16.3902(12)                                                                      | 16.347(2)                                                                        | 16.317(3)                                                                        | 16.304(3)                                                                        | 16.2252(9)                                                                       |
| $\alpha$ (°)                                                                | 78.7970(10)                                                                      | 78.969(3)                                                                        | 78.947(3)                                                                        | 78.978(4)                                                                        | 79.0640(10)                                                                      |
| $\beta$ (°)                                                                 | 77.3460(10)                                                                      | 77.335(3)                                                                        | 77.370(4)                                                                        | 77.352(4)                                                                        | 77.5790(10)                                                                      |
| $\gamma$ (°)                                                                | 65.5370(10)                                                                      | 65.518(2)                                                                        | 65.555(4)                                                                        | 65.513(3)                                                                        | 65.7110(10)                                                                      |
| <i>V</i> (Å <sup>3</sup> )                                                  | 2836.6(4)                                                                        | 2831.0(6)                                                                        | 2830.8(10)                                                                       | 2819.6(10)                                                                       | 2817.2(3)                                                                        |
| <i>Z</i>                                                                    | 1                                                                                | 1                                                                                | 1                                                                                | 1                                                                                | 1                                                                                |
| $\rho_{\text{calcd}}$ (g·cm <sup>-3</sup> )                                 | 1.453                                                                            | 1.463                                                                            | 1.465                                                                            | 1.480                                                                            | 1.485                                                                            |
| $\mu$ (mm <sup>-1</sup> )                                                   | 0.983                                                                            | 1.105                                                                            | 1.175                                                                            | 1.244                                                                            | 1.394                                                                            |
| <i>F</i> (000)                                                              | 1258                                                                             | 1262                                                                             | 1264                                                                             | 1270                                                                             | 1270                                                                             |
| reflns collected                                                            | 14362                                                                            | 14346                                                                            | 14170                                                                            | 14184                                                                            | 14338                                                                            |
| Reflns unique                                                               | 9948                                                                             | 9900                                                                             | 9886                                                                             | 9867                                                                             | 9869                                                                             |
| <i>R</i> <sub>(int)</sub>                                                   | 0.0294                                                                           | 0.0644                                                                           | 0.0607                                                                           | 0.0595                                                                           | 0.0263                                                                           |
| parameters                                                                  | 766                                                                              | 766                                                                              | 766                                                                              | 772                                                                              | 766                                                                              |
| S on F <sup>2</sup>                                                         | 0.951                                                                            | 0.967                                                                            | 1.083                                                                            | 0.937                                                                            | 1.037                                                                            |
| <i>R</i> <sub>1</sub> , w <i>R</i> <sub>2</sub> [ <i>I</i> >2σ( <i>I</i> )] | 0.0478, 0.1271                                                                   | 0.0699, 0.1269                                                                   | 0.0898, 0.1854                                                                   | 0.0599, 0.0935                                                                   | 0.0417, 0.1050                                                                   |
| <i>R</i> <sub>1</sub> , w <i>R</i> <sub>2</sub> (all data)                  | 0.0589, 0.1378                                                                   | 0.1106, 0.1495                                                                   | 0.1129, 0.2028                                                                   | 0.1096, 0.1120                                                                   | 0.0524, 0.1155                                                                   |
| $\Delta\rho_{\text{max and min}}$ (e·Å <sup>-3</sup> )                      | 1.138 and -0.767                                                                 | 0.918 and -0.670                                                                 | 0.931 and -1.932                                                                 | 0.823 and -0.787                                                                 | 1.649 and -0.910                                                                 |
|                                                                             | <b>7</b>                                                                         | <b>8</b>                                                                         | <b>9</b>                                                                         | <b>15</b>                                                                        | <b>16</b>                                                                        |
| empirical formula                                                           | C <sub>132</sub> H <sub>94</sub> N <sub>18</sub> Ho <sub>2</sub> O <sub>17</sub> | C <sub>132</sub> H <sub>94</sub> N <sub>18</sub> Er <sub>2</sub> O <sub>17</sub> | C <sub>132</sub> H <sub>94</sub> N <sub>18</sub> Yb <sub>2</sub> O <sub>17</sub> | C <sub>60</sub> H <sub>40</sub> Gd <sub>2</sub> N <sub>6</sub> O <sub>14</sub>   | C <sub>60</sub> H <sub>40</sub> Er <sub>2</sub> N <sub>6</sub> O <sub>14</sub>   |
| formula weight                                                              | 2534.13                                                                          | 2538.79                                                                          | 2550.35                                                                          | 1383.49                                                                          | 1403.51                                                                          |
| crystal system                                                              | Triclinic                                                                        | Triclinic                                                                        | Triclinic                                                                        | Triclinic                                                                        | Triclinic                                                                        |
| space group                                                                 | P-1                                                                              | P-1                                                                              | P-1                                                                              | P-1                                                                              | P-1                                                                              |
| <i>a</i> (Å)                                                                | 13.6709(18)                                                                      | 13.6968(15)                                                                      | 13.6997(17)                                                                      | 8.6566(11)                                                                       | 8.5902(5)                                                                        |
| <i>b</i> (Å)                                                                | 14.3413(18)                                                                      | 14.3565(17)                                                                      | 14.3367(18)                                                                      | 11.3992(15)                                                                      | 11.3902(7)                                                                       |
| <i>c</i> (Å)                                                                | 16.202(2)                                                                        | 16.2082(17)                                                                      | 16.203(2)                                                                        | 14.6846(18)                                                                      | 14.6020(9)                                                                       |
| $\alpha$ (°)                                                                | 79.129(2)                                                                        | 79.075(2)                                                                        | 79.004(2)                                                                        | 69.373(2)                                                                        | 69.5730(10)                                                                      |
| $\beta$ (°)                                                                 | 77.703(2)                                                                        | 77.696(2)                                                                        | 77.826(2)                                                                        | 73.559(2)                                                                        | 73.7410(10)                                                                      |
| $\gamma$ (°)                                                                | 65.706(2)                                                                        | 65.666(2)                                                                        | 65.631(2)                                                                        | 82.771(2)                                                                        | 82.7900(10)                                                                      |
| <i>V</i> (Å <sup>3</sup> )                                                  | 2810.6(6)                                                                        | 2818.7(5)                                                                        | 2814.4(6)                                                                        | 1300.2(3)                                                                        | 1284.72(13)                                                                      |
| <i>Z</i>                                                                    | 1                                                                                | 1                                                                                | 1                                                                                | 1                                                                                | 1                                                                                |
| $\rho_{\text{calcd}}$ (g·cm <sup>-3</sup> )                                 | 1.494                                                                            | 1.492                                                                            | 1.501                                                                            | 1.767                                                                            | 1.814                                                                            |
| $\mu$ (mm <sup>-1</sup> )                                                   | 1.476                                                                            | 1.557                                                                            | 1.730                                                                            | 2.606                                                                            | 3.323                                                                            |
| <i>F</i> (000)                                                              | 9815                                                                             | 1278                                                                             | 1282                                                                             | 682                                                                              | 690                                                                              |

|                                                  |                  |                  |                  |                  |                  |
|--------------------------------------------------|------------------|------------------|------------------|------------------|------------------|
| reflns collected                                 | 14070            | 14341            | 14110            | 6380             | 6507             |
| Reflns unique                                    | 9815             | 9855             | 9806             | 4489             | 4483             |
| $R_{(int)}$                                      | 0.0392           | 0.0343           | 0.0315           | 0.0193           | 0.0197           |
| parameters                                       | 772              | 772              | 772              | 376              | 376              |
| S on $F^2$                                       | 1.003            | 1.051            | 0.980            | 1.087            | 1.029            |
| $R_1, wR_2 [I > 2\sigma(I)]$                     | 0.0506, 0.1100   | 0.0492, 0.1063   | 0.0412, 0.0893   | 0.0285, 0.0575   | 0.0239, 0.0505   |
| $R_1, wR_2$ (all data)                           | 0.0706, 0.1213   | 0.0704, 0.1222   | 0.0539, 0.0948   | 0.0318, 0.0592   | 0.0267, 0.0518   |
| $\Delta\rho_{max}$ and $\min(e.\text{\AA}^{-3})$ | 1.438 and -0.512 | 1.514 and -0.895 | 1.359 and -0.921 | 0.663 and -0.575 | 0.527 and -0.545 |

**Table S2. Selected Bond Length ( $\text{\AA}$ ) and Angles ( $^\circ$ ) for 1-16**

| <b>1</b>          |            |                   |            |
|-------------------|------------|-------------------|------------|
| Nd(1)-O(1)        | 2.447(4)   | Nd(1)-O(5)#1      | 2.751(3)   |
| Nd(1)-O(2)        | 2.512(3)   | Nd(1)-O(6)#1      | 2.496(3)   |
| Nd(1)-O(3)        | 2.509(3)   | Nd(1)-N(1)#2      | 2.614(4)   |
| Nd(1)-O(4)        | 2.492(3)   | O(5)-Nd(1)#1      | 2.751(3)   |
| Nd(1)-O(5)        | 2.405(3)   | O(6)-Nd(1)#1      | 2.496(3)   |
| Nd(1)-O(7)        | 2.504(4)   | N(1)-Nd(1)#2      | 2.614(4)   |
| O(5)-Nd(1)-O(4)   | 76.04(11)  | O(5)-Nd(1)-O(1)   | 91.21(12)  |
| O(5)-Nd(1)-O(6)#1 | 115.00(10) | O(1)-Nd(1)-O(4)   | 87.33(12)  |
| O(4)-Nd(1)-O(6)#1 | 77.67(12)  | O(1)-Nd(1)-O(6)#1 | 144.93(11) |
| O(1)-Nd(1)-O(7)   | 124.79(11) | O(5)-Nd(1)-O(7)   | 80.91(11)  |

|                     |            |                     |            |
|---------------------|------------|---------------------|------------|
| O(6)#1-Nd(1)-O(7)   | 84.03(12)  | O(4)-Nd(1)-O(7)     | 140.75(11) |
| O(1)-Nd(1)-O(3)     | 74.17(12)  | O(5)-Nd(1)-O(3)     | 125.66(11) |
| O(6)#1-Nd(1)-O(3)   | 71.62(12)  | O(4)-Nd(1)-O(3)     | 51.78(10)  |
| O(5)-Nd(1)-O(2)     | 84.84(11)  | O(7)-Nd(1)-O(3)     | 149.53(12) |
| O(4)-Nd(1)-O(2)     | 135.14(12) | O(1)-Nd(1)-O(2)     | 52.47(11)  |
| O(7)-Nd(1)-O(2)     | 72.36(12)  | O(6)#1-Nd(1)-O(2)   | 146.56(12) |
| O(5)-Nd(1)-N(1)#2   | 158.37(12) | O(3)-Nd(1)-O(2)     | 119.90(11) |
| O(4)-Nd(1)-N(1)#2   | 125.11(12) | O(1)-Nd(1)-N(1)#2   | 85.85(13)  |
| O(7)-Nd(1)-N(1)#2   | 83.21(13)  | O(6)#1-Nd(1)-N(1)#2 | 77.62(12)  |
| O(2)-Nd(1)-N(1)#2   | 76.38(12)  | O(3)-Nd(1)-N(1)#2   | 74.05(12)  |
| O(1)-Nd(1)-O(5)#1   | 152.68(11) | O(5)-Nd(1)-O(5)#1   | 66.69(12)  |
| O(6)#1-Nd(1)-O(5)#1 | 48.85(9)   | O(4)-Nd(1)-O(5)#1   | 72.33(11)  |
| O(3)-Nd(1)-O(5)#1   | 104.98(10) | O(7)-Nd(1)-O(5)#1   | 69.49(10)  |
| N(1)#2-Nd(1)-O(5)#1 | 120.64(12) | O(2)-Nd(1)-O(5)#1   | 135.09(10) |
| Nd(1)-O(5)-Nd(1)#1  | 113.31(12) |                     |            |

**2**

|                     |            |                     |            |
|---------------------|------------|---------------------|------------|
| Sm(1)-O(1)          | 2.458(5)   | Sm(1)-O(5)#1        | 2.759(5)   |
| Sm(1)-O(2)          | 2.490(5)   | Sm(1)-O(6)#1        | 2.464(5)   |
| Sm(1)-O(3)          | 2.487(5)   | Sm(1)-N(4)#2        | 2.587(6)   |
| Sm(1)-O(4)          | 2.407(5)   | O(5)-Sm(1)#1        | 2.759(5)   |
| Sm(1)-O(5)          | 2.365(5)   | O(6)-Sm(1)#1        | 2.464(5)   |
| Sm(1)-O(7)          | 2.471(5)   | N(4)-Sm(1)#2        | 2.587(6)   |
| O(5)-Sm(1)-O(4)     | 90.77(17)  | O(4)-Sm(1)-O(1)     | 87.13(18)  |
| O(5)-Sm(1)-O(1)     | 75.79(16)  | O(4)-Sm(1)-O(6)#1   | 145.12(17) |
| O(5)-Sm(1)-O(6)#1   | 115.10(17) | O(5)-Sm(1)-O(7)     | 80.93(16)  |
| O(1)-Sm(1)-O(6)#1   | 77.83(18)  | O(1)-Sm(1)-O(7)     | 140.43(17) |
| O(4)-Sm(1)-O(7)     | 125.05(18) | O(5)-Sm(1)-O(3)     | 84.12(17)  |
| O(6)#1-Sm(1)-O(7)   | 83.83(17)  | O(1)-Sm(1)-O(3)     | 134.87(18) |
| O(4)-Sm(1)-O(3)     | 52.75(17)  | O(7)-Sm(1)-O(3)     | 72.35(17)  |
| O(6)#1-Sm(1)-O(3)   | 146.83(17) | O(4)-Sm(1)-O(2)     | 74.39(18)  |
| O(5)-Sm(1)-O(2)     | 126.11(16) | O(6)#1-Sm(1)-O(2)   | 71.47(17)  |
| O(1)-Sm(1)-O(2)     | 52.47(15)  | O(3)-Sm(1)-O(2)     | 120.30(17) |
| O(7)-Sm(1)-O(2)     | 149.04(17) | O(4)-Sm(1)-N(4)#2   | 86.11(19)  |
| O(5)-Sm(1)-N(4)#2   | 158.02(18) | O(6)#1-Sm(1)-N(4)#2 | 77.86(19)  |
| O(1)-Sm(1)-N(4)#2   | 125.66(18) | O(3)-Sm(1)-N(4)#2   | 76.68(19)  |
| O(7)-Sm(1)-N(4)#2   | 83.11(18)  | O(5)-Sm(1)-O(5)#1   | 66.34(18)  |
| O(2)-Sm(1)-N(4)#2   | 73.85(18)  | O(1)-Sm(1)-O(5)#1   | 72.30(16)  |
| O(4)-Sm(1)-O(5)#1   | 152.05(16) | O(7)-Sm(1)-O(5)#1   | 69.15(16)  |
| O(6)#1-Sm(1)-O(5)#1 | 49.32(14)  | O(2)-Sm(1)-O(5)#1   | 105.46(16) |
| O(3)-Sm(1)-O(5)#1   | 134.20(15) | Sm(1)-O(5)-Sm(1)#1  | 113.66(18) |
| N(4)#2-Sm(1)-O(5)#1 | 121.16(18) |                     |            |

**3**

|            |          |            |          |
|------------|----------|------------|----------|
| Eu(1)-O(1) | 2.458(6) | Eu(1)-O(7) | 2.454(7) |
|------------|----------|------------|----------|

|                      |            |                      |            |
|----------------------|------------|----------------------|------------|
| Eu(1)-O(2)           | 2.756(6)   | Eu(1)-O(2)#1         | 2.368(6)   |
| Eu(1)-O(3)           | 2.476(7)   | Eu(1)-N(4)#2         | 2.580(8)   |
| Eu(1)-O(4)           | 2.406(7)   | O(2)-Eu(1)#1         | 2.368(6)   |
| Eu(1)-O(5)           | 2.491(6)   | N(4)-Eu(1)#2         | 2.580(8)   |
| Eu(1)-O(6)           | 2.438(7)   | Eu(1)-Eu(1)#1        | 4.2884(12) |
| O(2)#1-Eu(1)-O(4)    | 90.1(2)    | Eu(1)#1-O(2)-Eu(1)   | 113.4(2)   |
| O(2)#1-Eu(1)-O(6)    | 75.8(2)    | O(4)-Eu(1)-O(6)      | 86.7(2)    |
| O(2)#1-Eu(1)-O(7)    | 81.0(2)    | O(4)-Eu(1)-O(7)      | 125.5(2)   |
| O(6)-Eu(1)-O(7)      | 140.2(2)   | O(2)#1-Eu(1)-O(1)    | 115.0(2)   |
| O(4)-Eu(1)-O(1)      | 145.6(2)   | O(6)-Eu(1)-O(1)      | 78.0(2)    |
| O(7)-Eu(1)-O(1)      | 83.3(2)    | O(2)#1-Eu(1)-O(3)    | 83.5(2)    |
| O(4)-Eu(1)-O(3)      | 53.2(2)    | O(6)-Eu(1)-O(3)      | 134.8(2)   |
| O(7)-Eu(1)-O(3)      | 72.4(2)    | O(1)-Eu(1)-O(3)      | 146.9(2)   |
| O(2)#1-Eu(1)-O(5)    | 126.6(2)   | O(4)-Eu(1)-O(5)      | 74.5(2)    |
| O(6)-Eu(1)-O(5)      | 53.0(2)    | O(7)-Eu(1)-O(5)      | 148.6(2)   |
| O(1)-Eu(1)-O(5)      | 71.7(2)    | O(3)-Eu(1)-O(5)      | 120.6(2)   |
| O(2)#1-Eu(1)-N(4)#2  | 157.4(2)   | O(4)-Eu(1)-N(4)#2    | 87.0(3)    |
| O(6)-Eu(1)-N(4)#2    | 126.3(2)   | O(7)-Eu(1)-N(4)#2    | 82.6(3)    |
| O(1)-Eu(1)-N(4)#2    | 78.1(2)    | O(3)-Eu(1)-N(4)#2    | 76.9(3)    |
| O(5)-Eu(1)-N(4)#2    | 74.0(2)    | O(2)#1-Eu(1)-O(2)    | 66.6(2)    |
| O(4)-Eu(1)-O(2)      | 151.5(2)   | O(6)-Eu(1)-O(2)      | 72.2(2)    |
| O(7)-Eu(1)-O(2)      | 69.0(2)    | O(1)-Eu(1)-O(2)      | 48.91(19)  |
| O(3)-Eu(1)-O(2)      | 133.9(2)   | O(5)-Eu(1)-O(2)      | 105.51(19) |
| N(4)#2-Eu(1)-O(2)    | 120.9(2)   | O(2)#1-Eu(1)-Eu(1)#1 | 36.15(15)  |
| O(4)-Eu(1)-Eu(1)#1   | 124.48(17) | O(6)-Eu(1)-Eu(1)#1   | 70.57(15)  |
| O(7)-Eu(1)-Eu(1)#1   | 71.54(16)  | O(1)-Eu(1)-Eu(1)#1   | 79.10(14)  |
| O(3)-Eu(1)-Eu(1)#1   | 112.49(16) | O(5)-Eu(1)-Eu(1)#1   | 120.07(14) |
| N(4)#2-Eu(1)-Eu(1)#1 | 147.1(2)   | O(2)-Eu(1)-Eu(1)#1   | 30.45(13)  |

|            |          |              |          |
|------------|----------|--------------|----------|
| Gd(1)-O(1) | 2.463(5) | Gd(1)-O(7)   | 2.421(5) |
| Gd(1)-O(2) | 2.396(5) | Gd(1)-O(3)#1 | 2.343(4) |
| Gd(1)-O(3) | 2.777(4) | Gd(1)-N(1)#2 | 2.554(5) |
| Gd(1)-O(4) | 2.441(4) | O(3)-Gd(1)#1 | 2.343(4) |
| Gd(1)-O(5) | 2.435(4) | N(1)-Gd(1)#2 | 2.554(5) |
| Gd(1)-O(6) | 2.469(4) |              |          |

|                    |            |                     |            |
|--------------------|------------|---------------------|------------|
| O(3)#1-Gd(1)-O(2)  | 90.04(16)  | O(3)#1-Gd(1)-O(7)   | 81.77(16)  |
| O(2)-Gd(1)-O(7)    | 126.49(17) | O(3)#1-Gd(1)-O(5)   | 75.81(14)  |
| O(2)-Gd(1)-O(5)    | 86.74(16)  | O(7)-Gd(1)-O(5)     | 139.87(16) |
| O(3)#1-Gd(1)-O(4)  | 115.47(15) | O(2)-Gd(1)-O(4)     | 145.31(15) |
| O(7)-Gd(1)-O(4)    | 82.34(17)  | O(5)-Gd(1)-O(4)     | 78.01(16)  |
| O(3)#1-Gd(1)-O(1)  | 83.37(15)  | O(2)-Gd(1)-O(1)     | 53.65(15)  |
| O(7)-Gd(1)-O(1)    | 72.87(17)  | O(5)-Gd(1)-O(1)     | 135.17(15) |
| O(4)-Gd(1)-O(1)    | 146.50(15) | O(3)#1-Gd(1)-O(6)   | 126.85(15) |
| O(2)-Gd(1)-O(6)    | 74.19(16)  | O(7)-Gd(1)-O(6)     | 147.45(16) |
| O(5)-Gd(1)-O(6)    | 53.36(14)  | O(4)-Gd(1)-O(6)     | 71.69(15)  |
| O(1)-Gd(1)-O(6)    | 120.52(15) | O(3)#1-Gd(1)-N(1)#2 | 157.10(16) |
| O(2)-Gd(1)-N(1)#2  | 86.65(18)  | O(7)-Gd(1)-N(1)#2   | 82.05(18)  |
| O(5)-Gd(1)-N(1)#2  | 126.51(16) | O(4)-Gd(1)-N(1)#2   | 78.15(17)  |
| O(1)-Gd(1)-N(1)#2  | 76.44(16)  | O(6)-Gd(1)-N(1)#2   | 73.82(16)  |
| O(3)#1-Gd(1)-O(3)  | 66.62(16)  | O(2)-Gd(1)-O(3)     | 151.32(14) |
| O(7)-Gd(1)-O(3)    | 68.65(15)  | O(5)-Gd(1)-O(3)     | 71.98(14)  |
| O(4)-Gd(1)-O(3)    | 49.34(13)  | O(1)-Gd(1)-O(3)     | 133.62(14) |
| O(6)-Gd(1)-O(3)    | 105.83(14) | N(1)#2-Gd(1)-O(3)   | 121.36(16) |
| Gd(1)#1-O(3)-Gd(1) | 113.38(15) |                     |            |

## 5

|            |          |              |          |
|------------|----------|--------------|----------|
| Tb(1)-O(1) | 2.456(3) | Tb(1)-O(7)   | 2.406(3) |
| Tb(1)-O(2) | 2.384(3) | Tb(1)-O(3)#1 | 2.788(3) |

|                     |            |                     |            |
|---------------------|------------|---------------------|------------|
| Tb(1)-O(3)          | 2.321(3)   | Tb(1)-O(4)#1        | 2.422(3)   |
| Tb(1)-O(5)          | 2.454(3)   | Tb(1)-N(1)#2        | 2.543(4)   |
| Tb(1)-O(6)          | 2.416(3)   | O(3)-Tb(1)#1        | 2.788(3)   |
| N(1)-Tb(1)#2        | 2.543(4)   | O(4)-Tb(1)#1        | 2.422(3)   |
| O(3)-Tb(1)-O(2)     | 90.10(11)  | O(2)-Tb(1)-O(6)     | 86.34(11)  |
| O(3)-Tb(1)-O(6)     | 75.89(10)  | O(2)-Tb(1)-O(7)     | 127.05(12) |
| O(3)-Tb(1)-O(7)     | 81.33(12)  | O(3)-Tb(1)-O(4)#1   | 114.64(10) |
| O(7)-Tb(1)-O(6)     | 139.51(11) | O(6)-Tb(1)-O(4)#1   | 77.91(11)  |
| O(2)-Tb(1)-O(4)#1   | 145.75(11) | O(3)-Tb(1)-O(5)     | 126.89(10) |
| O(7)-Tb(1)-O(4)#1   | 81.93(12)  | O(6)-Tb(1)-O(5)     | 53.15(10)  |
| O(2)-Tb(1)-O(5)     | 74.30(11)  | O(4)#1-Tb(1)-O(5)   | 71.89(11)  |
| O(7)-Tb(1)-O(5)     | 147.47(12) | O(2)-Tb(1)-O(1)     | 53.72(11)  |
| O(3)-Tb(1)-O(1)     | 83.13(11)  | O(7)-Tb(1)-O(1)     | 73.36(12)  |
| O(6)-Tb(1)-O(1)     | 134.76(11) | O(5)-Tb(1)-O(1)     | 120.83(11) |
| O(4)#1-Tb(1)-O(1)   | 147.10(11) | O(2)-Tb(1)-N(1)#2   | 86.93(12)  |
| O(3)-Tb(1)-N(1)#2   | 156.92(12) | O(7)-Tb(1)-N(1)#2   | 82.27(12)  |
| O(6)-Tb(1)-N(1)#2   | 126.65(11) | O(5)-Tb(1)-N(1)#2   | 74.12(11)  |
| O(4)#1-Tb(1)-N(1)#2 | 78.79(12)  | O(3)-Tb(1)-O(3)#1   | 66.19(11)  |
| O(1)-Tb(1)-N(1)#2   | 76.68(12)  | O(6)-Tb(1)-O(3)#1   | 72.04(10)  |
| O(2)-Tb(1)-O(3)#1   | 150.85(10) | O(4)#1-Tb(1)-O(3)#1 | 48.93(9)   |
| O(7)-Tb(1)-O(3)#1   | 68.22(10)  | O(1)-Tb(1)-O(3)#1   | 133.41(10) |
| O(5)-Tb(1)-O(3)#1   | 105.70(10) | Tb(1)-O(3)-Tb(1)#1  | 113.68(11) |
| N(1)#2-Tb(1)-O(3)#1 | 121.58(11) |                     |            |

## 6

|            |          |              |          |
|------------|----------|--------------|----------|
| Dy(1)-O(1) | 2.448(3) | Dy(1)-O(7)   | 2.401(3) |
| Dy(1)-O(2) | 2.372(3) | Dy(1)-O(5)#1 | 2.306(3) |
| Dy(1)-O(3) | 2.445(3) | Dy(1)-N(1)#2 | 2.520(4) |
| Dy(1)-O(4) | 2.413(3) | O(5)-Dy(1)#1 | 2.306(3) |

|                     |            |                    |            |
|---------------------|------------|--------------------|------------|
| Dy(1)-O(5)          | 2.815(3)   | N(1)-Dy(1)#2       | 2.520(4)   |
| Dy(1)-O(6)          | 2.402(3)   |                    |            |
| O(5)#1-Dy(1)-O(2)   | 89.91(12)  | O(2)-Dy(1)-O(6)    | 145.93(12) |
| O(5)#1-Dy(1)-O(6)   | 114.54(11) | O(2)-Dy(1)-O(7)    | 127.10(12) |
| O(5)#1-Dy(1)-O(7)   | 80.97(12)  | O(5)#1-Dy(1)-O(4)  | 75.83(11)  |
| O(6)-Dy(1)-O(7)     | 81.98(12)  | O(6)-Dy(1)-O(4)    | 77.88(12)  |
| O(2)-Dy(1)-O(4)     | 86.29(12)  | O(5)#1-Dy(1)-O(3)  | 127.15(11) |
| O(7)-Dy(1)-O(4)     | 139.18(11) | O(6)-Dy(1)-O(3)    | 72.10(12)  |
| O(2)-Dy(1)-O(3)     | 74.21(12)  | O(4)-Dy(1)-O(3)    | 53.54(11)  |
| O(7)-Dy(1)-O(3)     | 147.67(12) | O(2)-Dy(1)-O(1)    | 53.95(12)  |
| O(5)#1-Dy(1)-O(1)   | 82.73(11)  | O(7)-Dy(1)-O(1)    | 73.19(12)  |
| O(6)-Dy(1)-O(1)     | 147.22(13) | O(3)-Dy(1)-O(1)    | 120.93(12) |
| O(4)-Dy(1)-O(1)     | 134.73(12) | O(2)-Dy(1)-N(1)#2  | 87.31(13)  |
| O(5)#1-Dy(1)-N(1)#2 | 156.65(12) | O(7)-Dy(1)-N(1)#2  | 82.28(12)  |
| O(6)-Dy(1)-N(1)#2   | 78.87(12)  | O(3)-Dy(1)-N(1)#2  | 74.16(12)  |
| O(4)-Dy(1)-N(1)#2   | 127.03(12) | O(5)#1-Dy(1)-O(5)  | 66.28(12)  |
| O(1)-Dy(1)-N(1)#2   | 76.91(13)  | O(6)-Dy(1)-O(5)    | 48.71(10)  |
| O(2)-Dy(1)-O(5)     | 150.63(11) | O(4)-Dy(1)-O(5)    | 71.82(11)  |
| O(7)-Dy(1)-O(5)     | 68.20(11)  | O(1)-Dy(1)-O(5)    | 133.22(10) |
| O(3)-Dy(1)-O(5)     | 105.79(10) | Dy(1)#1-O(5)-Dy(1) | 113.72(12) |
| N(1)#2-Dy(1)-O(5)   | 121.41(12) |                    |            |

7

|            |          |              |          |
|------------|----------|--------------|----------|
| Ho(1)-O(1) | 2.357(4) | Ho(1)-O(5)#1 | 2.838(4) |
| Ho(1)-O(2) | 2.434(4) | Ho(1)-O(6)#1 | 2.385(4) |
| Ho(1)-O(3) | 2.439(4) | Ho(1)-N(1)#2 | 2.510(5) |
| Ho(1)-O(4) | 2.393(4) | O(5)-Ho(1)#1 | 2.838(4) |
| Ho(1)-O(5) | 2.282(4) | O(6)-Ho(1)#1 | 2.385(4) |
| Ho(1)-O(7) | 2.386(4) | N(1)-Ho(1)#2 | 2.510(5) |



|                     |            |                     |            |
|---------------------|------------|---------------------|------------|
| O(5)-Ho(1)-O(1)     | 90.19(14)  | O(5)-Ho(1)-O(6)#1   | 114.06(14) |
| O(1)-Ho(1)-O(6)#1   | 146.22(14) | O(5)-Ho(1)-O(7)     | 81.59(15)  |
| O(1)-Ho(1)-O(7)     | 127.65(15) | O(6)#1-Ho(1)-O(7)   | 80.98(15)  |
| O(5)-Ho(1)-O(4)     | 75.27(13)  | O(1)-Ho(1)-O(4)     | 86.75(14)  |
| O(6)#1-Ho(1)-O(4)   | 77.86(14)  | O(7)-Ho(1)-O(4)     | 138.55(14) |
| O(5)-Ho(1)-O(2)     | 82.83(13)  | O(1)-Ho(1)-O(2)     | 54.36(14)  |
| O(6)#1-Ho(1)-O(2)   | 146.86(15) | O(7)-Ho(1)-O(2)     | 73.30(14)  |
| O(4)-Ho(1)-O(2)     | 135.20(14) | O(5)-Ho(1)-O(3)     | 126.81(13) |
| O(1)-Ho(1)-O(3)     | 74.09(14)  | O(6)#1-Ho(1)-O(3)   | 72.54(14)  |
| O(7)-Ho(1)-O(3)     | 147.13(15) | O(4)-Ho(1)-O(3)     | 53.82(13)  |
| O(2)-Ho(1)-O(3)     | 121.37(14) | O(5)-Ho(1)-N(1)#2   | 156.55(15) |
| O(1)-Ho(1)-N(1)#2   | 87.13(16)  | O(6)#1-Ho(1)-N(1)#2 | 79.23(15)  |
| O(7)-Ho(1)-N(1)#2   | 81.67(16)  | O(4)-Ho(1)-N(1)#2   | 127.74(14) |
| O(2)-Ho(1)-N(1)#2   | 76.70(15)  | O(3)-Ho(1)-N(1)#2   | 74.64(15)  |
| O(5)-Ho(1)-O(5)#1   | 65.92(15)  | O(1)-Ho(1)-O(5)#1   | 150.93(13) |
| O(6)#1-Ho(1)-O(5)#1 | 48.64(12)  | O(7)-Ho(1)-O(5)#1   | 67.46(13)  |
| O(4)-Ho(1)-O(5)#1   | 71.78(13)  | O(2)-Ho(1)-O(5)#1   | 132.33(12) |
| O(3)-Ho(1)-O(5)#1   | 106.25(12) | N(1)#2-Ho(1)-O(5)#1 | 121.42(14) |
| Ho(1)-O(5)-Ho(1)#1  | 114.08(15) |                     |            |

## 8

|                 |           |                 |           |
|-----------------|-----------|-----------------|-----------|
| Er(1)-O(1)      | 2.396(4)  | Er(1)-O(5)#1    | 2.884(4)  |
| Er(1)-O(2)      | 2.424(4)  | Er(1)-O(6)#1    | 2.378(4)  |
| Er(1)-O(3)      | 2.344(4)  | Er(1)-N(4)#2    | 2.506(5)  |
| Er(1)-O(4)      | 2.432(4)  | O(5)-Er(1)#1    | 2.884(4)  |
| Er(1)-O(5)      | 2.275(4)  | O(6)-Er(1)#1    | 2.378(4)  |
| Er(1)-O(7)      | 2.371(4)  | N(4)-Er(1)#2    | 2.506(5)  |
|                 |           |                 |           |
| O(5)-Er(1)-O(3) | 89.75(15) | O(5)-Er(1)-O(7) | 81.13(15) |

|                     |            |                     |            |
|---------------------|------------|---------------------|------------|
| O(3)-Er(1)-O(7)     | 128.05(15) | O(5)-Er(1)-O(6)#1   | 113.49(13) |
| O(3)-Er(1)-O(6)#1   | 146.67(14) | O(7)-Er(1)-O(6)#1   | 80.90(15)  |
| O(5)-Er(1)-O(1)     | 75.29(13)  | O(3)-Er(1)-O(1)     | 86.45(14)  |
| O(7)-Er(1)-O(1)     | 138.01(14) | O(6)#1-Er(1)-O(1)   | 77.48(14)  |
| O(5)-Er(1)-O(2)     | 127.20(14) | O(3)-Er(1)-O(2)     | 74.32(14)  |
| O(7)-Er(1)-O(2)     | 147.05(16) | O(6)#1-Er(1)-O(2)   | 72.59(14)  |
| O(1)-Er(1)-O(2)     | 54.17(13)  | O(5)-Er(1)-O(4)     | 82.49(14)  |
| O(3)-Er(1)-O(4)     | 54.40(14)  | O(7)-Er(1)-O(4)     | 73.68(15)  |
| O(6)#1-Er(1)-O(4)   | 147.53(15) | O(1)-Er(1)-O(4)     | 134.96(15) |
| O(2)-Er(1)-O(4)     | 121.41(13) | O(5)-Er(1)-N(4)#2   | 156.29(15) |
| O(3)-Er(1)-N(4)#2   | 87.54(16)  | O(7)-Er(1)-N(4)#2   | 82.06(15)  |
| O(6)#1-Er(1)-N(4)#2 | 80.02(15)  | O(1)-Er(1)-N(4)#2   | 127.97(14) |
| O(2)-Er(1)-N(4)#2   | 74.48(14)  | O(4)-Er(1)-N(4)#2   | 76.80(15)  |
| O(5)-Er(1)-O(5)#1   | 66.14(15)  | O(3)-Er(1)-O(5)#1   | 150.62(13) |
| O(7)-Er(1)-O(5)#1   | 66.97(13)  | O(6)#1-Er(1)-O(5)#1 | 47.88(12)  |
| O(1)-Er(1)-O(5)#1   | 71.81(13)  | O(2)-Er(1)-O(5)#1   | 106.23(12) |
| O(4)-Er(1)-O(5)#1   | 132.32(12) | N(4)#2-Er(1)-O(5)#1 | 121.33(14) |
| Er(1)-O(5)-Er(1)#1  | 113.86(15) |                     |            |

## 9

|                   |            |                   |            |
|-------------------|------------|-------------------|------------|
| Yb(1)-O(1)        | 2.343(3)   | Yb(1)-O(7)        | 2.342(4)   |
| Yb(1)-O(2)        | 2.998(3)   | Yb(1)-O(2)#1      | 2.231(3)   |
| Yb(1)-O(3)        | 2.390(3)   | Yb(1)-N(7)#2      | 2.481(4)   |
| Yb(1)-O(4)        | 2.374(3)   | O(2)-Yb(1)#1      | 2.231(3)   |
| Yb(1)-O(5)        | 2.320(3)   | N(7)-Yb(1)#2      | 2.481(4)   |
| Yb(1)-O(6)        | 2.416(3)   |                   |            |
| O(2)#1-Yb(1)-O(5) | 89.52(12)  | O(2)#1-Yb(1)-O(7) | 80.89(12)  |
| O(5)-Yb(1)-O(7)   | 128.64(12) | O(2)#1-Yb(1)-O(1) | 111.73(12) |
| O(5)-Yb(1)-O(1)   | 148.18(12) | O(7)-Yb(1)-O(1)   | 79.68(12)  |

|                    |            |                     |            |
|--------------------|------------|---------------------|------------|
| O(2)#1-Yb(1)-O(4)  | 74.90(11)  | O(5)-Yb(1)-O(4)     | 86.95(12)  |
| O(7)-Yb(1)-O(4)    | 136.64(12) | O(1)-Yb(1)-O(4)     | 76.76(12)  |
| O(2)#1-Yb(1)-O(3)  | 127.11(11) | O(5)-Yb(1)-O(3)     | 74.98(11)  |
| O(7)-Yb(1)-O(3)    | 146.67(12) | O(1)-Yb(1)-O(3)     | 73.30(11)  |
| O(4)-Yb(1)-O(3)    | 54.43(10)  | O(2)#1-Yb(1)-O(6)   | 82.38(11)  |
| O(5)-Yb(1)-O(6)    | 54.86(11)  | O(7)-Yb(1)-O(6)     | 73.84(12)  |
| O(1)-Yb(1)-O(6)    | 147.59(12) | O(4)-Yb(1)-O(6)     | 135.63(12) |
| O(3)-Yb(1)-O(6)    | 122.40(11) | O(2)#1-Yb(1)-N(7)#2 | 155.87(13) |
| O(5)-Yb(1)-N(7)#2  | 88.41(13)  | O(7)-Yb(1)-N(7)#2   | 81.70(13)  |
| O(1)-Yb(1)-N(7)#2  | 81.25(12)  | O(4)-Yb(1)-N(7)#2   | 128.95(12) |
| O(3)-Yb(1)-N(7)#2  | 75.31(12)  | O(6)-Yb(1)-N(7)#2   | 76.80(12)  |
| O(2)#1-Yb(1)-O(2)  | 65.76(12)  | O(5)-Yb(1)-O(2)     | 150.61(10) |
| O(7)-Yb(1)-O(2)    | 65.42(10)  | O(1)-Yb(1)-O(2)     | 46.61(10)  |
| O(4)-Yb(1)-O(2)    | 71.92(10)  | O(3)-Yb(1)-O(2)     | 106.58(10) |
| O(6)-Yb(1)-O(2)    | 130.99(10) | N(7)#2-Yb(1)-O(2)   | 120.70(12) |
| Yb(1)#1-O(2)-Yb(1) | 114.24(12) |                     |            |

## 10

|                   |            |                   |            |
|-------------------|------------|-------------------|------------|
| Pr(1)-O(1)        | 2.513(3)   | Pr(1)-O(4)#2      | 2.524(3)   |
| Pr(1)-O(2)        | 2.577(2)   | Pr(1)-O(6)#1      | 2.490(3)   |
| Pr(1)-O(3)        | 2.497(2)   | Pr(1)-N(3)#3      | 2.746(3)   |
| Pr(1)-O(5)        | 2.511(3)   | O(4)-Pr(1)#2      | 2.524(3)   |
| Pr(1)-O(7)        | 2.492(3)   | O(6)-Pr(1)#1      | 2.490(3)   |
| Pr(1)-O(8)        | 2.471(3)   | N(3)-Pr(1)#4      | 2.746(3)   |
| O(8)-Pr(1)-O(6)#1 | 90.41(10)  | O(8)-Pr(1)-O(7)   | 72.71(12)  |
| O(6)#1-Pr(1)-O(7) | 73.20(11)  | O(8)-Pr(1)-O(3)   | 132.61(9)  |
| O(6)#1-Pr(1)-O(3) | 86.97(9)   | O(7)-Pr(1)-O(3)   | 148.77(10) |
| O(8)-Pr(1)-O(5)   | 141.93(10) | O(6)#1-Pr(1)-O(5) | 64.40(8)   |
| O(7)-Pr(1)-O(5)   | 72.83(11)  | O(3)-Pr(1)-O(5)   | 76.92(9)   |

|                     |            |                     |            |
|---------------------|------------|---------------------|------------|
| O(8)-Pr(1)-O(1)     | 131.99(10) | O(6)#1-Pr(1)-O(1)   | 135.52(9)  |
| O(7)-Pr(1)-O(1)     | 103.52(12) | O(3)-Pr(1)-O(1)     | 73.88(9)   |
| O(5)-Pr(1)-O(1)     | 72.20(9)   | O(8)-Pr(1)-O(4)#2   | 69.51(9)   |
| O(6)#1-Pr(1)-O(4)#2 | 73.96(9)   | O(7)-Pr(1)-O(4)#2   | 128.90(12) |
| O(3)-Pr(1)-O(4)#2   | 64.33(8)   | O(5)-Pr(1)-O(4)#2   | 123.71(9)  |
| O(1)-Pr(1)-O(4)#2   | 127.27(9)  | O(8)-Pr(1)-O(2)     | 84.91(10)  |
| O(6)#1-Pr(1)-O(2)   | 143.23(9)  | O(7)-Pr(1)-O(2)     | 70.58(10)  |
| O(3)-Pr(1)-O(2)     | 122.27(9)  | O(5)-Pr(1)-O(2)     | 98.46(9)   |
| O(1)-Pr(1)-O(2)     | 51.02(8)   | O(4)#2-Pr(1)-O(2)   | 136.24(9)  |
| O(8)-Pr(1)-N(3)#3   | 76.25(10)  | O(6)#1-Pr(1)-N(3)#3 | 144.64(9)  |
| O(7)-Pr(1)-N(3)#3   | 130.41(10) | O(3)-Pr(1)-N(3)#3   | 79.09(9)   |
| O(5)-Pr(1)-N(3)#3   | 140.39(9)  | O(1)-Pr(1)-N(3)#3   | 71.09(9)   |
| O(4)#2-Pr(1)-N(3)#3 | 70.71(9)   | O(2)-Pr(1)-N(3)#3   | 69.01(9)   |

## 11

|              |          |               |           |
|--------------|----------|---------------|-----------|
| Pr(1)-O(1)   | 2.497(3) | Pr(1)-O(6)#3  | 2.505(3)  |
| Pr(1)-O(3)   | 2.598(3) | O(1)-Pr(1)#2  | 2.681(3)  |
| Pr(1)-O(4)   | 2.505(3) | O(2)-Pr(1)#2  | 2.493(3)  |
| Pr(1)-O(7)   | 2.503(3) | O(3)-Pr(1)#4  | 2.543(3)  |
| Pr(1)-O(1)#2 | 2.681(3) | O(5)-Pr(1)#1  | 2.420(3)  |
| Pr(1)-O(2)#2 | 2.493(3) | O(6)-Pr(1)#5  | 2.505(3)  |
| Pr(1)-O(3)#4 | 2.543(3) | Pr(1)-Pr(1)#2 | 4.0755(5) |
| Pr(1)-O(5)#1 | 2.420(3) |               |           |

|                     |            |                     |           |
|---------------------|------------|---------------------|-----------|
| O(5)#1-Pr(1)-O(2)#2 | 78.84(10)  | O(2)#2-Pr(1)-O(1)   | 124.22(9) |
| O(5)#1-Pr(1)-O(1)   | 71.79(10)  | O(2)#2-Pr(1)-O(7)   | 72.48(10) |
| O(5)#1-Pr(1)-O(7)   | 82.79(10)  | O(5)#1-Pr(1)-O(4)   | 75.73(10) |
| O(1)-Pr(1)-O(7)     | 144.30(10) | O(1)-Pr(1)-O(4)     | 79.24(10) |
| O(2)#2-Pr(1)-O(4)   | 136.92(10) | O(5)#1-Pr(1)-O(6)#3 | 135.79(9) |
| O(7)-Pr(1)-O(4)     | 70.31(10)  | O(1)-Pr(1)-O(6)#3   | 73.84(10) |

|                      |            |                      |            |
|----------------------|------------|----------------------|------------|
| O(2)#2-Pr(1)-O(6)#3  | 98.84(10)  | O(4)-Pr(1)-O(6)#3    | 123.57(10) |
| O(7)-Pr(1)-O(6)#3    | 139.23(10) | O(2)#2-Pr(1)-O(3)#4  | 76.74(10)  |
| O(5)#1-Pr(1)-O(3)#4  | 148.00(10) | O(7)-Pr(1)-O(3)#4    | 70.36(10)  |
| O(1)-Pr(1)-O(3)#4    | 139.85(9)  | O(6)#3-Pr(1)-O(3)#4  | 68.88(9)   |
| O(4)-Pr(1)-O(3)#4    | 109.52(9)  | O(2)#2-Pr(1)-O(3)    | 142.11(9)  |
| O(5)#1-Pr(1)-O(3)    | 126.31(9)  | O(7)-Pr(1)-O(3)      | 82.46(10)  |
| O(1)-Pr(1)-O(3)      | 92.61(9)   | O(6)#3-Pr(1)-O(3)    | 81.83(9)   |
| O(4)-Pr(1)-O(3)      | 50.70(9)   | O(5)#1-Pr(1)-O(1)#2  | 73.27(9)   |
| O(3)#4-Pr(1)-O(3)    | 68.16(10)  | O(1)-Pr(1)-O(1)#2    | 76.24(10)  |
| O(2)#2-Pr(1)-O(1)#2  | 49.96(9)   | O(4)-Pr(1)-O(1)#2    | 145.12(9)  |
| O(7)-Pr(1)-O(1)#2    | 120.38(10) | O(3)#4-Pr(1)-O(1)#2  | 105.23(9)  |
| O(6)#3-Pr(1)-O(1)#2  | 72.21(9)   | O(5)#1-Pr(1)-Pr(1)#2 | 67.62(6)   |
| O(3)-Pr(1)-O(1)#2    | 153.67(9)  | O(1)-Pr(1)-Pr(1)#2   | 39.72(6)   |
| O(2)#2-Pr(1)-Pr(1)#2 | 85.49(7)   | O(4)-Pr(1)-Pr(1)#2   | 115.17(7)  |
| O(7)-Pr(1)-Pr(1)#2   | 146.12(8)  | O(3)#4-Pr(1)-Pr(1)#2 | 129.88(6)  |
| O(6)#3-Pr(1)-Pr(1)#2 | 68.19(7)   | O(1)#2-Pr(1)-Pr(1)#2 | 36.52(6)   |
| O(3)-Pr(1)-Pr(1)#2   | 128.14(7)  | Pr(1)#4-O(3)-Pr(1)   | 111.84(10) |
| Pr(1)-O(1)-Pr(1)#2   | 103.76(10) |                      |            |

## 12

|                     |            |                   |            |
|---------------------|------------|-------------------|------------|
| Er(1)-O(1)          | 2.271(4)   | Er(1)-N(1)#4      | 2.539(5)   |
| Er(1)-O(3)          | 2.827(5)   | O(2)-Er(1)#6      | 2.339(4)   |
| Er(1)-O(4)          | 2.321(4)   | O(3)-Er(1)#6      | 2.314(5)   |
| Er(1)-O(2)#1        | 2.339(4)   | O(5)-Er(1)#7      | 2.342(5)   |
| Er(1)-O(3)#1        | 2.314(5)   | O(6)-Er(1)#8      | 2.318(5)   |
| Er(1)-O(5)#3        | 2.342(5)   | N(1)-Er(1)#5      | 2.539(5)   |
| Er(1)-O(6)#2        | 2.318(5)   |                   |            |
| O(1)-Er(1)-O(3)#1   | 75.39(16)  | O(1)-Er(1)-O(6)#2 | 79.93(17)  |
| O(3)#1-Er(1)-O(6)#2 | 100.01(17) | O(1)-Er(1)-O(4)   | 123.19(15) |

|                     |            |                     |            |
|---------------------|------------|---------------------|------------|
| O(3)#1-Er(1)-O(4)   | 161.32(16) | O(6)#2-Er(1)-O(4)   | 83.02(18)  |
| O(1)-Er(1)-O(2)#1   | 144.72(15) | O(3)#1-Er(1)-O(2)#1 | 87.85(16)  |
| O(6)#2-Er(1)-O(2)#1 | 134.24(16) | O(4)-Er(1)-O(2)#1   | 77.24(15)  |
| O(1)-Er(1)-O(5)#3   | 74.57(17)  | O(3)#1-Er(1)-O(5)#3 | 108.81(16) |
| O(6)#2-Er(1)-O(5)#3 | 134.62(17) | O(4)-Er(1)-O(5)#3   | 80.53(17)  |
| O(2)#1-Er(1)-O(5)#3 | 82.13(15)  | O(1)-Er(1)-N(1)#4   | 136.38(17) |
| O(3)#1-Er(1)-N(1)#4 | 78.28(17)  | O(6)#2-Er(1)-N(1)#4 | 71.12(18)  |
| O(4)-Er(1)-N(1)#4   | 85.42(17)  | O(2)#1-Er(1)-N(1)#4 | 66.52(16)  |
| O(5)#3-Er(1)-N(1)#4 | 147.81(16) | O(1)-Er(1)-O(3)     | 74.16(15)  |
| O(3)#1-Er(1)-O(3)   | 148.36(8)  | O(6)#2-Er(1)-O(3)   | 66.31(17)  |
| O(4)-Er(1)-O(3)     | 49.44(14)  | O(2)#1-Er(1)-O(3)   | 122.54(14) |
| O(5)#3-Er(1)-O(3)   | 70.89(14)  | N(1)#4-Er(1)-O(3)   | 119.62(16) |
| Er(1)#6-O(3)-Er(1)  | 112.90(16) |                     |            |

### 13

|                     |            |                     |            |
|---------------------|------------|---------------------|------------|
| Nd(1)-O(3)          | 2.4161(18) | O(1)-Nd(1)#3        | 2.409(2)   |
| Nd(1)-N(1)          | 2.671(2)   | O(2)-Nd(1)#6        | 2.435(2)   |
| Nd(1)-O(1)#3        | 2.409(2)   | O(3)-Nd(1)#5        | 2.643(2)   |
| Nd(1)-O(2)#4        | 2.435(2)   | O(4)-Nd(1)#5        | 2.483(2)   |
| Nd(1)-O(3)#5        | 2.643(2)   | O(5)-Nd(1)#1        | 2.357(2)   |
| Nd(1)-O(4)#5        | 2.483(2)   | O(6)-Nd(1)#7        | 2.3755(19) |
| Nd(1)-O(5)#1        | 2.357(2)   | Nd(1)-Nd(1)#5       | 4.0522(4)  |
| Nd(1)-O(6)#2        | 2.3755(19) |                     |            |
| O(5)#1-Nd(1)-O(6)#2 | 83.16(7)   | O(5)#1-Nd(1)-O(1)#3 | 92.02(7)   |
| O(6)#2-Nd(1)-O(1)#3 | 144.63(7)  | O(5)#1-Nd(1)-O(3)   | 79.48(7)   |
| O(6)#2-Nd(1)-O(3)   | 137.83(7)  | O(1)#3-Nd(1)-O(3)   | 74.43(7)   |
| O(5)#1-Nd(1)-O(2)#4 | 111.49(8)  | O(6)#2-Nd(1)-O(2)#4 | 77.19(7)   |
| O(1)#3-Nd(1)-O(2)#4 | 135.92(7)  | O(3)-Nd(1)-O(2)#4   | 74.07(7)   |
| O(5)#1-Nd(1)-O(4)#5 | 156.05(7)  | O(6)#2-Nd(1)-O(4)#5 | 81.78(7)   |

|                      |           |                      |           |
|----------------------|-----------|----------------------|-----------|
| O(1)#3-Nd(1)-O(4)#5  | 89.57(7)  | O(3)-Nd(1)-O(4)#5    | 123.79(6) |
| O(2)#4-Nd(1)-O(4)#5  | 83.11(7)  | O(5)#1-Nd(1)-O(3)#5  | 151.05(7) |
| O(6)#2-Nd(1)-O(3)#5  | 124.38(7) | O(1)#3-Nd(1)-O(3)#5  | 70.74(7)  |
| O(3)-Nd(1)-O(3)#5    | 73.64(7)  | O(2)#4-Nd(1)-O(3)#5  | 71.32(7)  |
| O(4)#5-Nd(1)-O(3)#5  | 50.35(6)  | O(5)#1-Nd(1)-N(1)    | 81.17(8)  |
| O(6)#2-Nd(1)-N(1)    | 72.21(8)  | O(1)#3-Nd(1)-N(1)    | 72.42(7)  |
| O(3)-Nd(1)-N(1)      | 140.69(7) | O(2)#4-Nd(1)-N(1)    | 145.19(7) |
| O(4)#5-Nd(1)-N(1)    | 76.55(8)  | O(3)#5-Nd(1)-N(1)    | 113.56(7) |
| O(5)#1-Nd(1)-Nd(1)#5 | 117.50(5) | O(6)#2-Nd(1)-Nd(1)#5 | 144.12(5) |
| O(1)#3-Nd(1)-Nd(1)#5 | 67.96(5)  | O(3)-Nd(1)-Nd(1)#5   | 38.74(5)  |
| O(2)#4-Nd(1)-Nd(1)#5 | 68.13(5)  | O(4)#5-Nd(1)-Nd(1)#5 | 85.15(5)  |
| O(3)#5-Nd(1)-Nd(1)#5 | 34.90(4)  | N(1)-Nd(1)-Nd(1)#5   | 136.22(6) |
| Nd(1)-O(3)-Nd(1)#5   | 106.36(7) |                      |           |

#### 14

|                     |           |                     |           |
|---------------------|-----------|---------------------|-----------|
| Eu(1)-O(3)          | 2.263(2)  | Eu(1)-O(6)#3        | 2.434(2)  |
| Eu(1)-O(5)          | 2.415(2)  | O(1)-Eu(1)#1        | 2.372(2)  |
| Eu(1)-O(7)          | 2.429(2)  | O(2)-Eu(1)#4        | 2.389(2)  |
| Eu(1)-N(1)          | 2.557(3)  | O(5)-Eu(1)#3        | 2.481(2)  |
| Eu(1)-O(1)#1        | 2.372(2)  | O(6)-Eu(1)#3        | 2.434(2)  |
| Eu(1)-O(2)#2        | 2.389(2)  | Eu(1)-Eu(1)#3       | 3.8840(4) |
| Eu(1)-O(5)#3        | 2.481(2)  |                     |           |
| O(3)-Eu(1)-O(1)#1   | 91.09(9)  | O(1)#1-Eu(1)-O(2)#2 | 138.99(8) |
| O(3)-Eu(1)-O(2)#2   | 100.01(9) | O(1)#1-Eu(1)-O(5)   | 73.92(8)  |
| O(3)-Eu(1)-O(5)     | 74.34(8)  | O(3)-Eu(1)-O(7)     | 78.55(9)  |
| O(2)#2-Eu(1)-O(5)   | 71.47(8)  | O(2)#2-Eu(1)-O(7)   | 74.20(8)  |
| O(1)#1-Eu(1)-O(7)   | 146.79(8) | O(3)-Eu(1)-O(6)#3   | 158.24(9) |
| O(5)-Eu(1)-O(7)     | 131.06(8) | O(2)#2-Eu(1)-O(6)#3 | 79.34(9)  |
| O(1)#1-Eu(1)-O(6)#3 | 103.70(9) | O(7)-Eu(1)-O(6)#3   | 80.40(9)  |

|                      |           |                      |           |
|----------------------|-----------|----------------------|-----------|
| O(5)-Eu(1)-O(6)#3    | 124.80(7) | O(1)#1-Eu(1)-O(5)#3  | 74.23(7)  |
| O(3)-Eu(1)-O(5)#3    | 148.65(8) | O(5)-Eu(1)-O(5)#3    | 75.01(8)  |
| O(2)#2-Eu(1)-O(5)#3  | 76.14(8)  | O(6)#3-Eu(1)-O(5)#3  | 52.70(7)  |
| O(7)-Eu(1)-O(5)#3    | 128.06(8) | O(1)#1-Eu(1)-N(1)    | 76.95(8)  |
| O(3)-Eu(1)-N(1)      | 90.61(9)  | O(5)-Eu(1)-N(1)      | 146.72(8) |
| O(2)#2-Eu(1)-N(1)    | 141.40(8) | O(6)#3-Eu(1)-N(1)    | 77.59(9)  |
| O(7)-Eu(1)-N(1)      | 71.76(9)  | O(3)-Eu(1)-Eu(1)#3   | 112.19(6) |
| O(5)#3-Eu(1)-N(1)    | 112.00(8) | O(2)#2-Eu(1)-Eu(1)#3 | 69.47(5)  |
| O(1)#1-Eu(1)-Eu(1)#3 | 69.77(5)  | O(7)-Eu(1)-Eu(1)#3   | 143.34(6) |
| O(5)-Eu(1)-Eu(1)#3   | 38.10(5)  | O(5)#3-Eu(1)-Eu(1)#3 | 36.91(5)  |
| O(6)#3-Eu(1)-Eu(1)#3 | 88.15(6)  | Eu(1)-O(5)-Eu(1)#3   | 104.99(8) |
| N(1)-Eu(1)-Eu(1)#3   | 139.38(6) |                      |           |

## 15

|                     |            |                     |            |
|---------------------|------------|---------------------|------------|
| Gd(1)-O(1)          | 2.377(3)   | Gd(1)-N(1)#2        | 2.549(3)   |
| Gd(1)-O(3)          | 2.399(3)   | O(2)-Gd(1)#1        | 2.365(3)   |
| Gd(1)-O(5)          | 2.259(3)   | O(3)-Gd(1)#1        | 2.471(3)   |
| Gd(1)-O(7)          | 2.420(3)   | O(4)-Gd(1)#1        | 2.427(3)   |
| Gd(1)-O(2)#1        | 2.365(3)   | N(1)-Gd(1)#3        | 2.549(3)   |
| Gd(1)-O(3)#1        | 2.471(3)   | Gd(1)-Gd(1)#1       | 3.8692(5)  |
| Gd(1)-O(4)#1        | 2.427(3)   |                     |            |
| O(5)-Gd(1)-O(2)#1   | 91.27(11)  | O(2)#1-Gd(1)-O(1)   | 139.59(9)  |
| O(5)-Gd(1)-O(1)     | 99.82(12)  | O(2)#1-Gd(1)-O(3)   | 74.29(9)   |
| O(5)-Gd(1)-O(3)     | 74.53(10)  | O(5)-Gd(1)-O(7)     | 78.44(11)  |
| O(1)-Gd(1)-O(3)     | 71.60(10)  | O(1)-Gd(1)-O(7)     | 74.24(10)  |
| O(2)#1-Gd(1)-O(7)   | 146.16(10) | O(5)-Gd(1)-O(4)#1   | 157.70(10) |
| O(3)-Gd(1)-O(7)     | 131.39(11) | O(1)-Gd(1)-O(4)#1   | 79.60(11)  |
| O(2)#1-Gd(1)-O(4)#1 | 103.65(11) | O(7)-Gd(1)-O(4)#1   | 79.99(11)  |
| O(3)-Gd(1)-O(4)#1   | 125.16(9)  | O(2)#1-Gd(1)-O(3)#1 | 74.58(9)   |



|                      |            |                      |            |
|----------------------|------------|----------------------|------------|
| O(5)-Gd(1)-O(3)#1    | 148.72(10) | O(3)-Gd(1)-O(3)#1    | 74.81(10)  |
| O(1)-Gd(1)-O(3)#1    | 76.11(10)  | O(4)#1-Gd(1)-O(3)#1  | 53.16(9)   |
| O(7)-Gd(1)-O(3)#1    | 128.01(10) | O(2)#1-Gd(1)-N(1)#2  | 76.23(10)  |
| O(5)-Gd(1)-N(1)#2    | 90.16(12)  | O(3)-Gd(1)-N(1)#2    | 146.25(10) |
| O(1)-Gd(1)-N(1)#2    | 141.67(10) | O(4)#1-Gd(1)-N(1)#2  | 77.69(11)  |
| O(7)-Gd(1)-N(1)#2    | 71.70(11)  | O(5)-Gd(1)-Gd(1)#1   | 112.36(8)  |
| O(3)#1-Gd(1)-N(1)#2  | 112.48(10) | O(1)-Gd(1)-Gd(1)#1   | 69.57(7)   |
| O(2)#1-Gd(1)-Gd(1)#1 | 70.26(7)   | O(7)-Gd(1)-Gd(1)#1   | 143.44(8)  |
| O(3)-Gd(1)-Gd(1)#1   | 38.05(6)   | O(3)#1-Gd(1)-Gd(1)#1 | 36.76(6)   |
| O(4)#1-Gd(1)-Gd(1)#1 | 88.52(7)   | Gd(1)-O(3)-Gd(1)#1   | 105.19(10) |
| N(1)#2-Gd(1)-Gd(1)#1 | 139.45(8)  |                      |            |

## 16

|                     |           |                     |           |
|---------------------|-----------|---------------------|-----------|
| Er(1)-O(3)          | 2.373(2)  | Er(1)-O(6)#1        | 2.203(3)  |
| Er(1)-O(4)          | 2.417(2)  | O(1)-Er(1)#2        | 2.316(2)  |
| Er(1)-O(7)          | 2.367(2)  | O(2)-Er(1)#4        | 2.331(2)  |
| Er(1)-N(1)          | 2.490(3)  | O(4)-Er(1)#1        | 2.359(2)  |
| Er(1)-O(1)#2        | 2.316(2)  | O(6)-Er(1)#1        | 2.203(3)  |
| Er(1)-O(2)#3        | 2.331(2)  | Er(1)-Er(1)#1       | 3.8034(3) |
| Er(1)-O(4)#1        | 2.359(2)  |                     |           |
| O(6)#1-Er(1)-O(1)#2 | 91.00(9)  | O(1)#2-Er(1)-O(2)#3 | 140.20(8) |
| O(6)#1-Er(1)-O(2)#3 | 99.78(10) | O(1)#2-Er(1)-O(4)#1 | 74.44(8)  |
| O(6)#1-Er(1)-O(4)#1 | 75.37(9)  | O(6)#1-Er(1)-O(7)   | 78.17(9)  |
| O(2)#3-Er(1)-O(4)#1 | 71.57(8)  | O(2)#3-Er(1)-O(7)   | 73.82(9)  |
| O(1)#2-Er(1)-O(7)   | 145.95(9) | O(6)#1-Er(1)-O(3)   | 156.53(9) |
| O(4)#1-Er(1)-O(7)   | 131.45(9) | O(2)#3-Er(1)-O(3)   | 79.82(9)  |
| O(1)#2-Er(1)-O(3)   | 104.36(9) | O(7)-Er(1)-O(3)     | 79.24(9)  |
| O(4)#1-Er(1)-O(3)   | 125.48(8) | O(1)#2-Er(1)-O(4)   | 74.70(8)  |
| O(6)#1-Er(1)-O(4)   | 149.10(8) | O(4)#1-Er(1)-O(4)   | 74.44(9)  |

|                      |           |                      |           |
|----------------------|-----------|----------------------|-----------|
| O(2)#3-Er(1)-O(4)    | 76.75(8)  | O(3)-Er(1)-O(4)      | 54.03(8)  |
| O(7)-Er(1)-O(4)      | 128.16(8) | O(1)#2-Er(1)-N(1)    | 75.75(9)  |
| O(6)#1-Er(1)-N(1)    | 88.71(10) | O(4)#1-Er(1)-N(1)    | 145.74(9) |
| O(2)#3-Er(1)-N(1)    | 142.03(9) | O(3)-Er(1)-N(1)      | 78.29(9)  |
| O(7)-Er(1)-N(1)      | 71.87(9)  | O(6)#1-Er(1)-Er(1)#1 | 112.86(6) |
| O(4)-Er(1)-N(1)      | 113.15(9) | O(2)#3-Er(1)-Er(1)#1 | 70.02(6)  |
| O(1)#2-Er(1)-Er(1)#1 | 70.48(6)  | O(7)-Er(1)-Er(1)#1   | 143.44(7) |
| O(4)#1-Er(1)-Er(1)#1 | 37.74(6)  | O(4)-Er(1)-Er(1)#1   | 36.70(5)  |
| O(3)-Er(1)-Er(1)#1   | 89.24(6)  | Er(1)#1-O(4)-Er(1)   | 105.56(9) |
| N(1)-Er(1)-Er(1)#1   | 139.68(7) |                      |           |

Symmetry transformations used to generate equivalent atoms: #1 -x+1,-y,-z; #2 -x+1,-y,-z+1 for **1**. #1 -x,-y+1,-z+1; #2 -x,-y+1,-z for **2**. #1 -x+2,-y+1,-z; #2 -x+2,-y+1,-z+1 for **3**. #1 -x,-y+1,-z+2; #2 -x,-y+1,-z+1 for **4**. #1 -x+2,-y,-z; #2 -x+2,-y,-z+1 for **5**. #1 -x+1,-y,-z; #2 -x+1,-y,-z+1 for **6**. #1 -x+1,-y+1,-z+1; #2 -x+1,-y+1,-z for **7**. #1 -x+2,-y,-z; #2 -x+2,-y,-z+1 for **8**. #1 -x,-y+1,-z+1; #2 -x,-y+1,-z for **9**. #1 -x+1,-y+1,-z+1; #2 -x+1,-y+2,-z+1; #3 x,y+1,z; #4 x,y-1,z for **10**. #1 -x+1,-y+1,-z+1; #2 -x,-y,-z+1; #3 x,y-1,z; #4 -x+1,-y,-z+1; #5 x,y+1,z for **11**. #1 x-1/2,-y+3/2,-z+1/4; #2 x,y+1,z; #3 x-1/2,-y+1/2,-z+1/4; #4 x-1/2,-y+5/2,-z+1/4; #5 x+1/2,-y+5/2,-z+1/2; #6 x+1/2,-y+3/2,-z+1/4; #7 x+1/2,-y+1/2,-z+1/4; #8 x,y-1,z for **12**. #1 -x+1,-y+1,-z+1; #2 x,y-1,z; #3 -x+1,-y,-z+2; #4 x+1,y,z-1; #5 -x+2,-y,-z+1; #6 x-1,y,z+1; #7 x,y+1,z for **13**. #1 -x+2,-y+1,-z; #2 x,y,z+1; #3 -x+2,-y+1,-z+1; #4 x,y,z-1 for **14**. #1 -x,-y+1,-z+1; #2 x,y,z+1; #3 x,y,z-1 for **15**. #1 -x,-y+1,-z; #2 -x,-y+1,-z+1; #3 x,y,z-1; #4 x,y,z+1 for **16**.

**Table S3.** The CIE coordinates of emissions for **3-Eu**, **5-Tb** and **A-I** excited at 365 nm.

| Sample         | CIE   |       |
|----------------|-------|-------|
|                | x     | y     |
| <b>5-Tb</b>    | 0.242 | 0.397 |
| <b>10% (A)</b> | 0.213 | 0.273 |
| <b>20% (B)</b> | 0.208 | 0.238 |

---

|                |       |       |
|----------------|-------|-------|
| <b>30% (C)</b> | 0.270 | 0.231 |
| <b>40% (D)</b> | 0.258 | 0.239 |
| <b>50% (E)</b> | 0.280 | 0.200 |
| <b>60% (F)</b> | 0.267 | 0.174 |
| <b>70% (G)</b> | 0.288 | 0.174 |
| <b>80% (H)</b> | 0.319 | 0.200 |
| <b>90% (I)</b> | 0.280 | 0.150 |
| <b>3-Eu</b>    | 0.614 | 0.343 |

**Table S4.** The CIE coordinates of emissions for **C** excited at different wavelengths.

| <b>Excitation</b> | <b>CIE</b> |          |
|-------------------|------------|----------|
|                   | <b>x</b>   | <b>y</b> |
| <b>(nm)</b>       |            |          |
| <b>310</b>        | 0.240      | 0.381    |
| <b>315</b>        | 0.254      | 0.380    |
| <b>320</b>        | 0.322      | 0.372    |

---

---

|            |       |       |
|------------|-------|-------|
| <b>325</b> | 0.330 | 0.368 |
| <b>330</b> | 0.334 | 0.348 |
| <b>335</b> | 0.335 | 0.318 |
| <b>340</b> | 0.326 | 0.293 |
| <b>345</b> | 0.314 | 0.271 |
| <b>350</b> | 0.303 | 0.255 |
| <b>355</b> | 0.291 | 0.241 |
| <b>360</b> | 0.280 | 0.228 |
| <b>365</b> | 0.268 | 0.217 |
| <b>370</b> | 0.253 | 0.204 |

**Figure S1.** The detail of  $\pi$ - $\pi$  interactions in **1**.

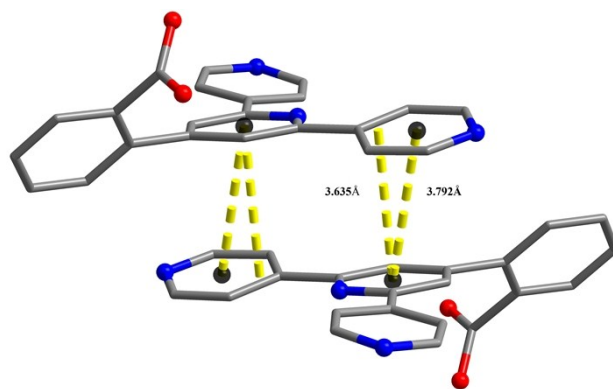

**Figure S2.** The detail of  $\pi$ - $\pi$  interactions in **2**.

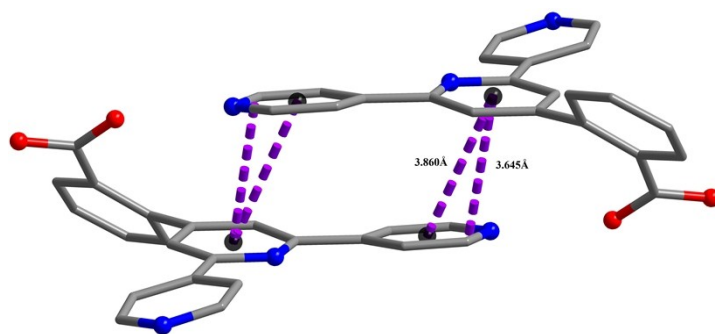

**Figure S3.** The view of 1D wavy chain inside **12**.

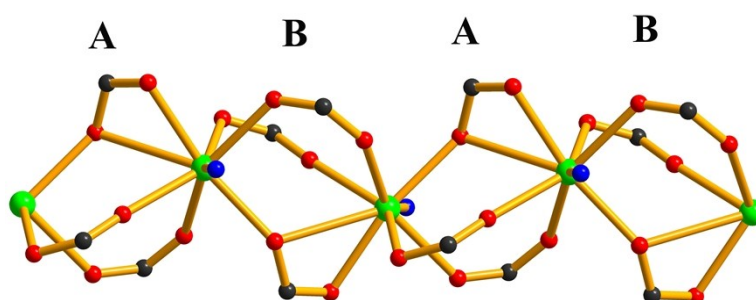

**Figure S4.** The view of double right-handed chain inside **12**.

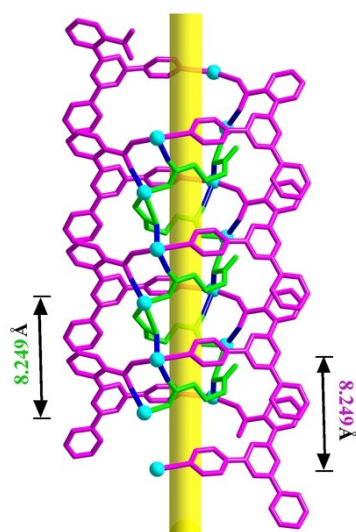

**Figure S5.** The detail of  $\pi$ - $\pi$  interactions in **14**.

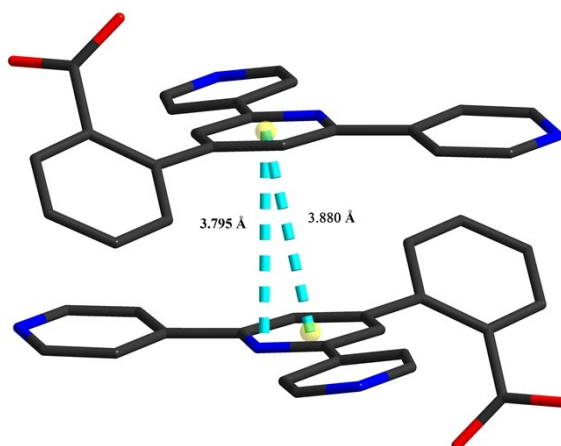

**Figure S6.** The emission spectra for compounds **1**, **2**, **4**, **6-13** and **16**.

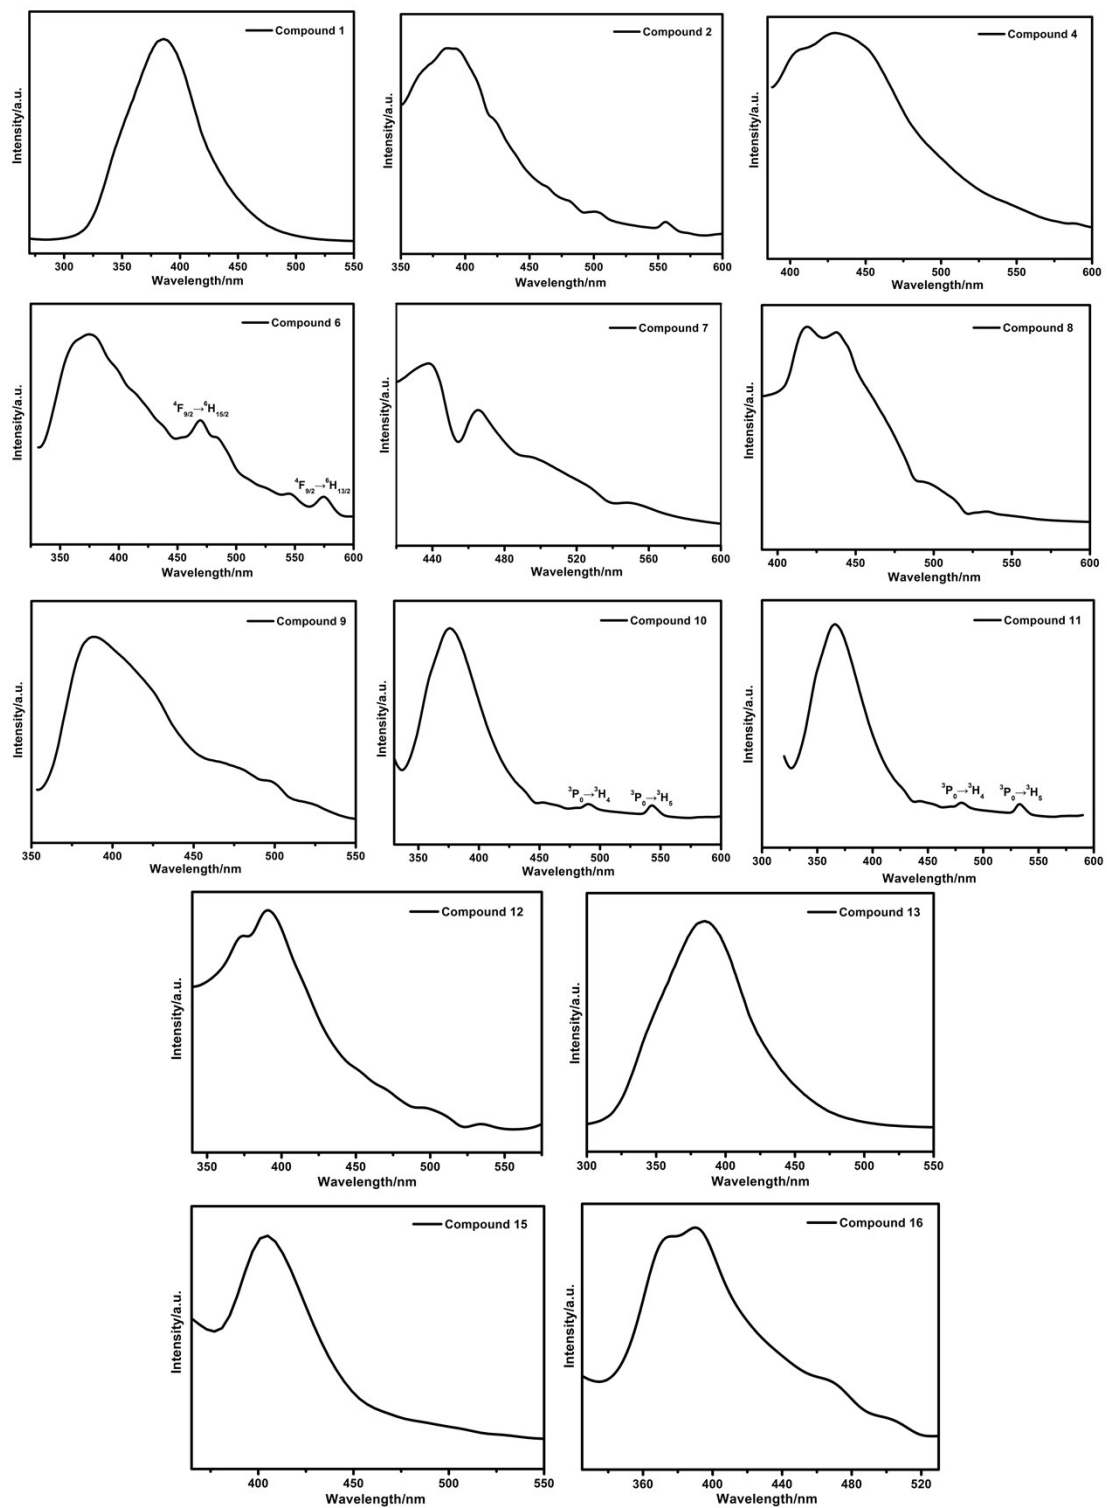

**Figure S7.** The excitation spectra for compounds **1-16**.

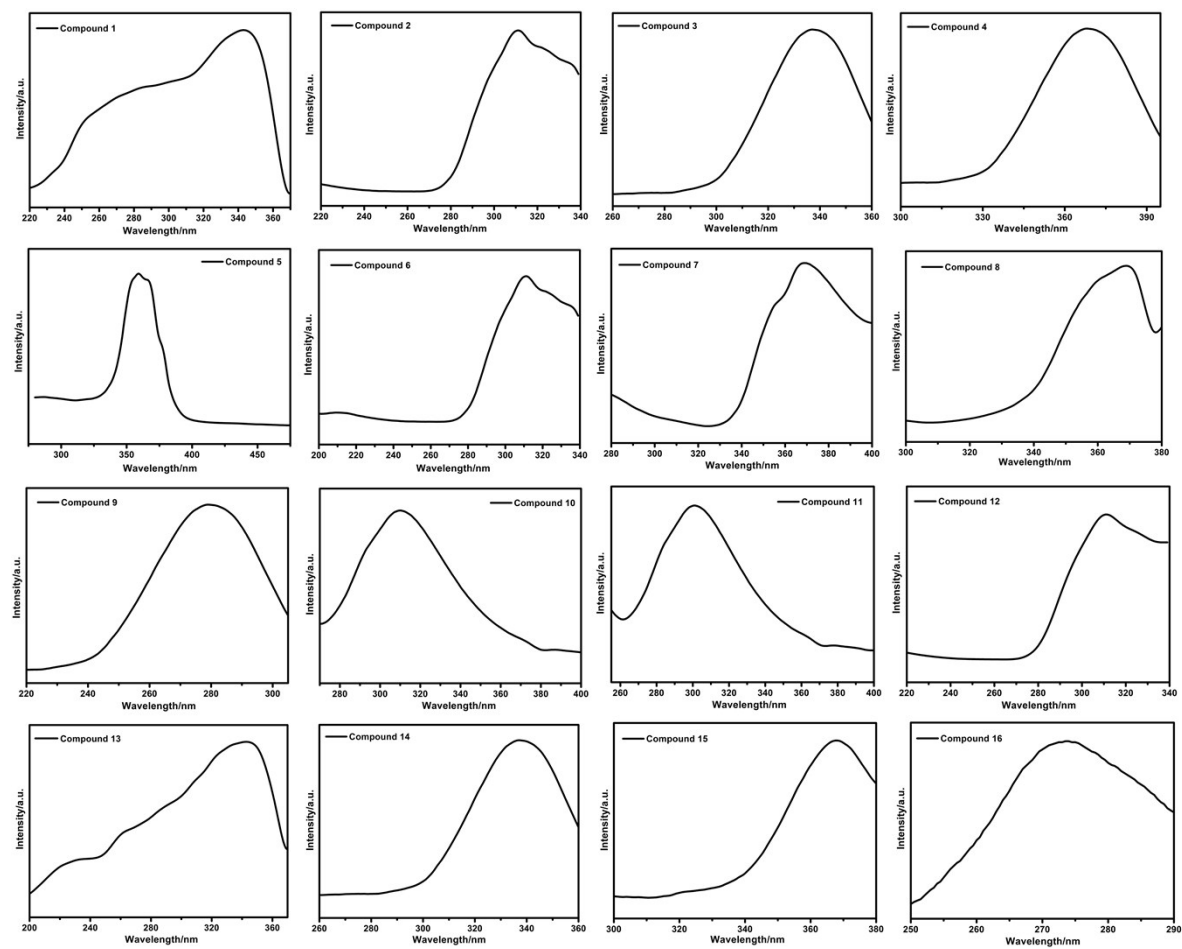



**Figure S8.** The co-existence of the Eu(III), Tb(III) ions and the ligand based emissions under different excitation.

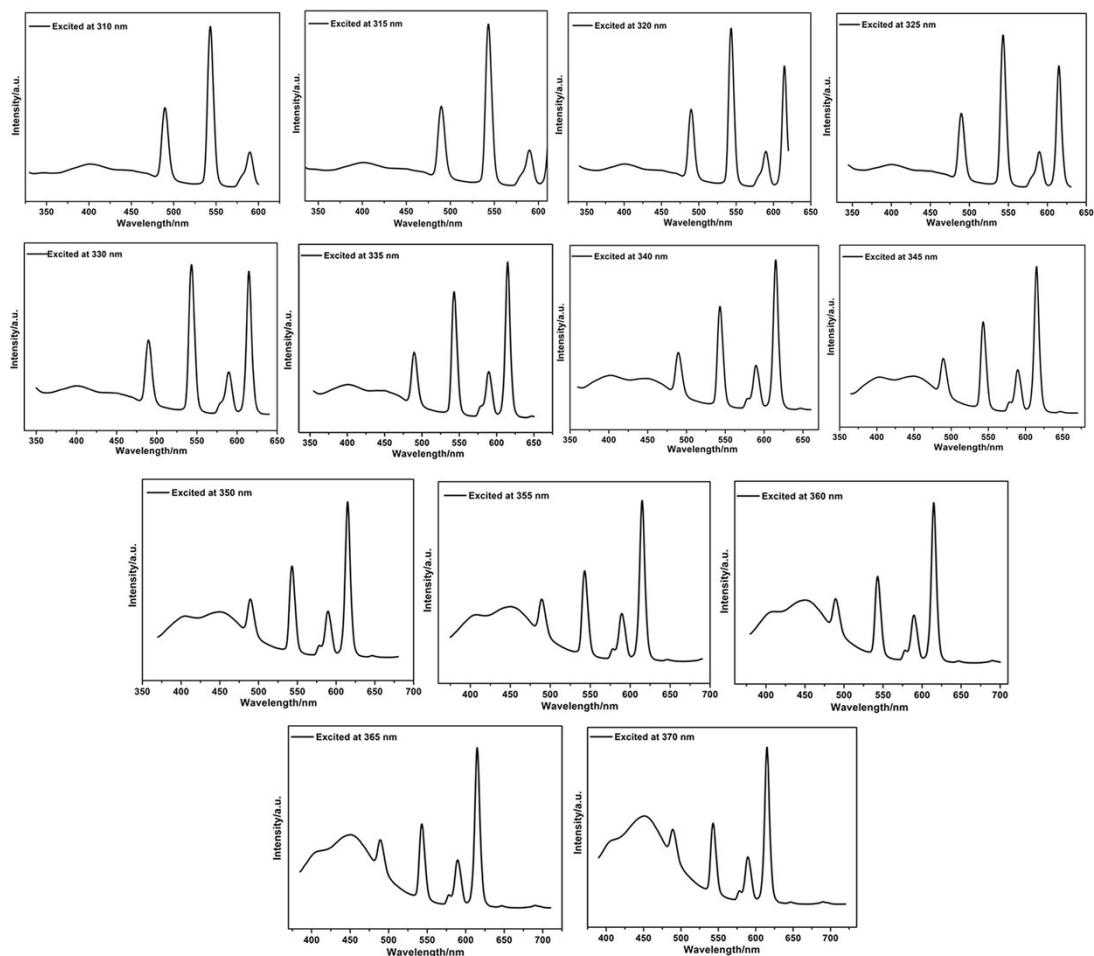

**Figure S9.** Excitation spectra of the doped compound C.

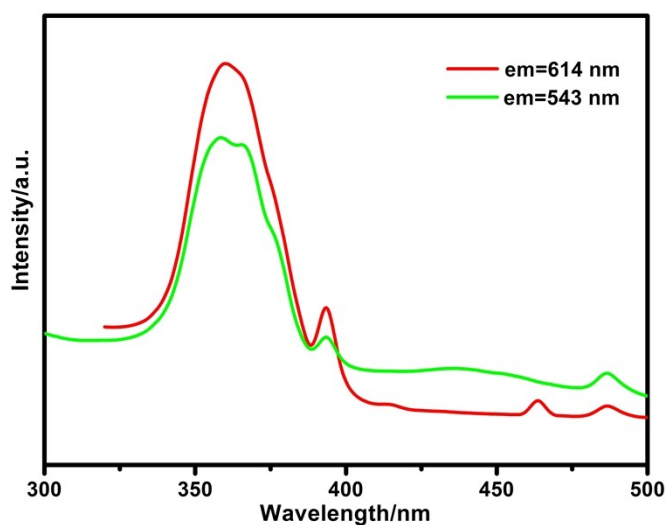

**Figure S10.** Emission spectra of compounds 3, 5 and the doped compound C excited

at 330 nm.

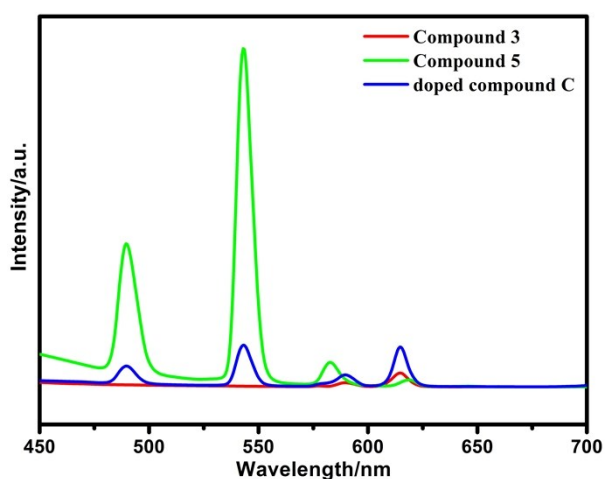

**Figure S11.** The simulated and experimental PXRD patterns for compounds **1-9** (a-simulated **1**, b-**1**, c-**2**, d-**3**, e-**4**, f-**5**, g-**6**, h-**7**, i-**8**, j-**9**).

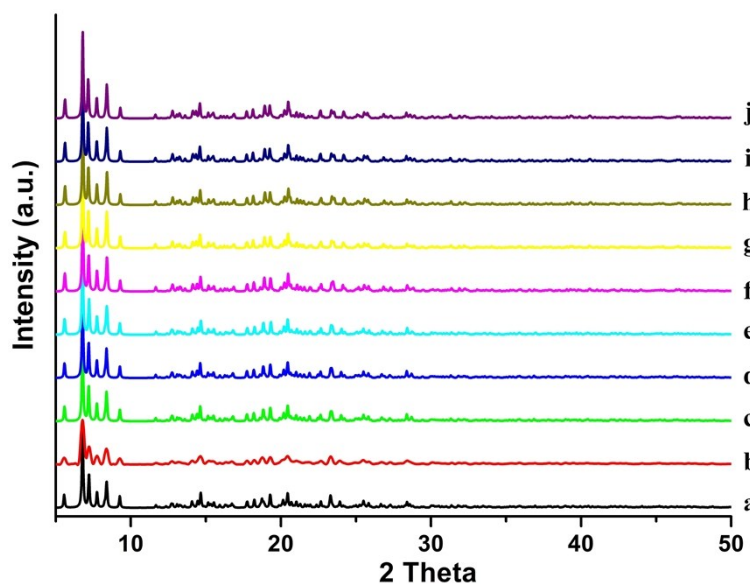

**Figure S12.** PXRD patterns of compounds **10-13** (a-d) simulated from the X-ray single-crystal structure and as-synthesized.

(a)

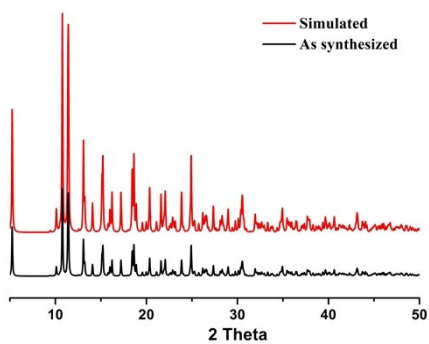

(b)

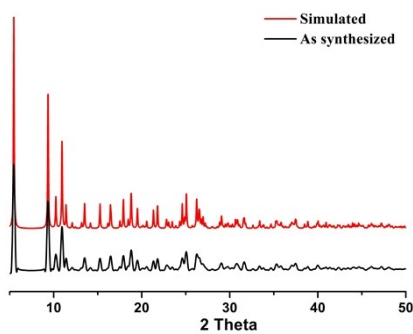

(c)

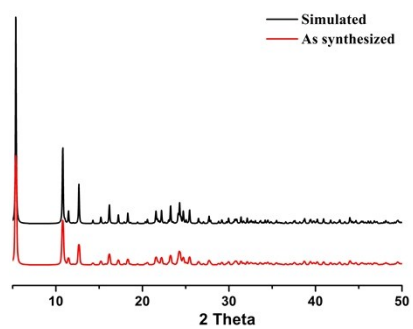

(d)

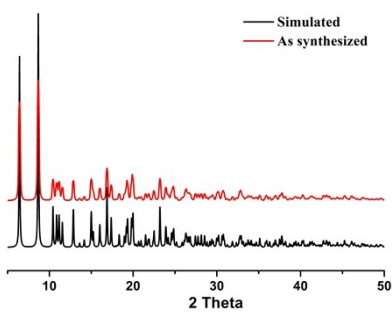

**Figure S13.** The simulated and experimental PXRD patterns for compounds 14-16 (a-simulated, b-14, c-15, d-16).

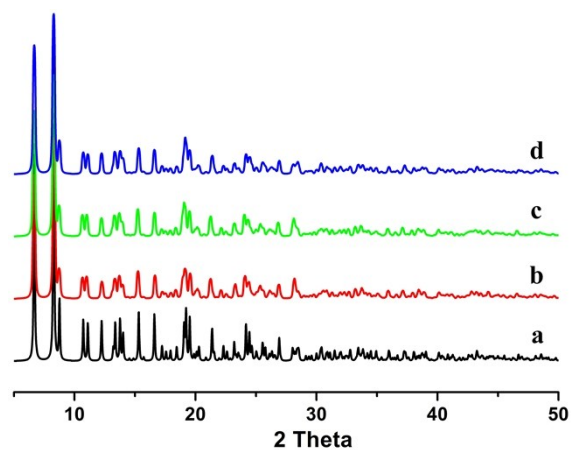

Figure S14. PXRD patterns of 3-Eu, 5-Tb and x%-Eu<sup>3+</sup>-doped 5-Tb

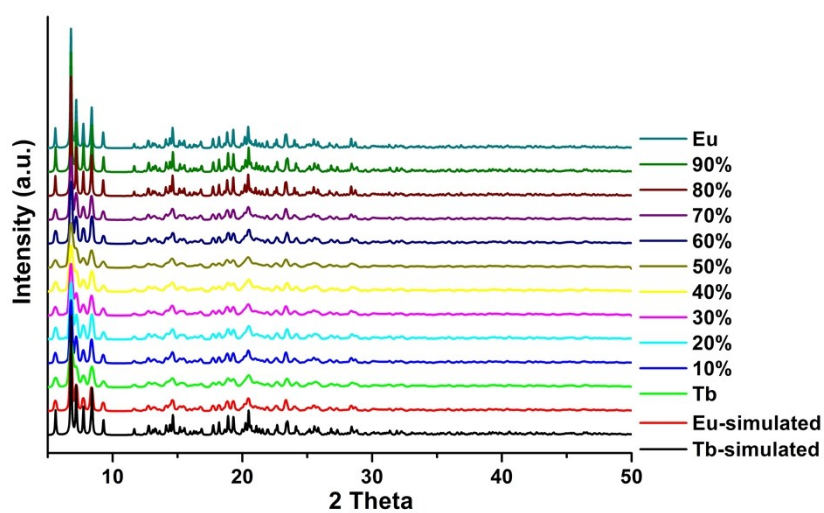

Figure S15. TGA curves for 1-10 (observed weight loss: 3.74% and 84.52%;

calculated weight loss: 3.71% and 84.81%).

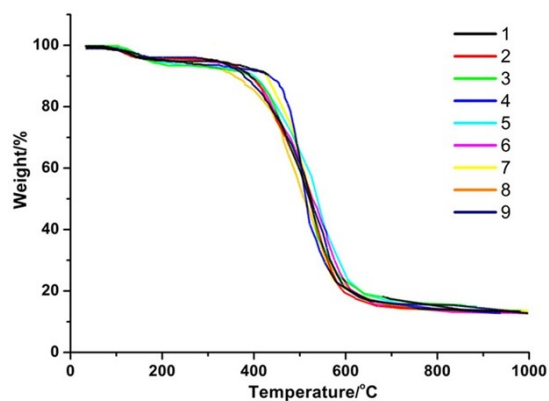

**Figure S16.** TGA curve for **10** (observed weight loss: 16.73% and 62.96%; calculated weight loss: 16.76% and 63.05%).

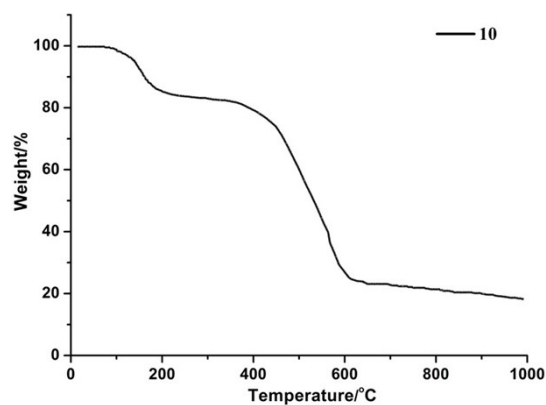

**Figure S17.** TGA curve for **11** (observed weight loss: 20.28% and 54.94%; calculated weight loss: 20.16% and 55.07%).

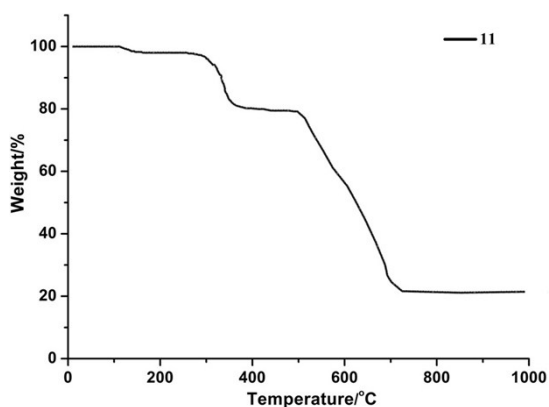

**Figure S18.** TGA curve for **12** (observed weight loss: 19.91% and 54.22%; calculated weight loss: 20.02% and 54.23%).

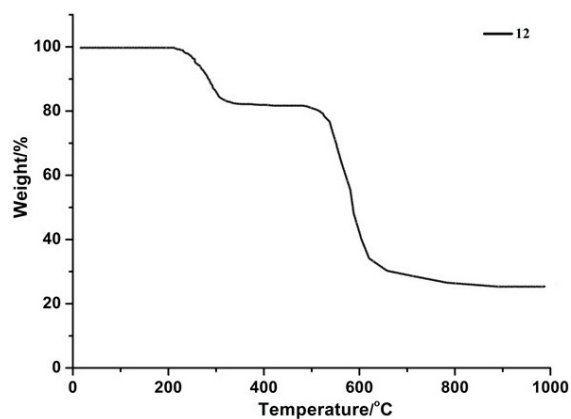

**Figure S19.** TGA curve for **13** (observed weight loss: 22.82% and 54.92%; calculated weight loss: 22.49% and 54.99%).

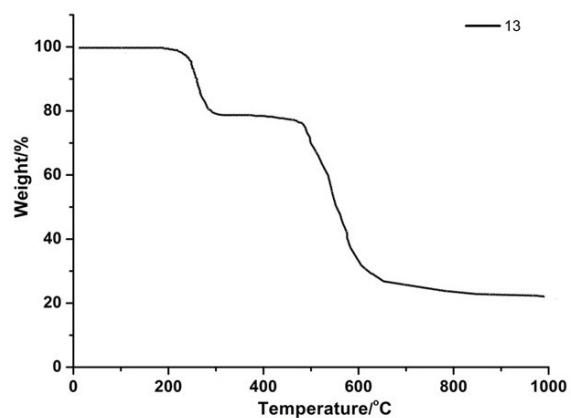

**Figure S20.** TGA curve for **14-16** (observed weight loss: 2.21%, 23.74% and 50.98%; calculated weight loss: 2.62%, 23.91% and 51.33%).

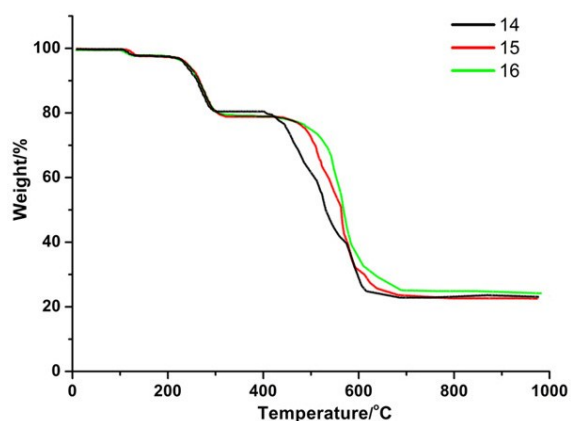

Supplement: c6ce00681g1.pdf [file c6ce00681g1.pdf]
